# Supplementary material
Source: PubMed Central journal article supplement (PMC9472675)
Supplement: ehp10923.smcontents.508.pdf [file ehp10923.smcontents.508.pdf]

**Note to readers with disabilities:** *EHP* strives to ensure that all journal content is accessible to all readers. However, some figures and Supplemental Material published in *EHP* articles may not conform to [508 standards](#) due to the complexity of the information being presented. If you need assistance accessing journal content, please contact [ehp508@niehs.nih.gov](mailto:ehp508@niehs.nih.gov). Our staff will work with you to assess and meet your accessibility needs within 3 working days.

### **Supplemental Material**

#### **Prolonged, Low-Level Exposure to the Marine Toxin, Domoic Acid, and Measures of Neurotoxicity in Nonhuman Primates**

Rebekah L. Petroff, Christopher Williams, Jian-Liang Li, James W. MacDonald, Theo K. Bammler, Todd Richards, Christopher N. English, Audrey Baldessari, Sara Shum, Jing Jing, Nina Isoherranen, Brenda Crouthamel, Noelle McKain, Kimberly S. Grant, Thomas M. Burbacher, and G. Jean Harry

#### **Table of Contents**

##### **Serum Chemistry Reactions on the Beckman Coulter AU System.**

**Table S1.** Animal Characteristics.

**Table S2.** Curated Gene Lists from Literature, Used in GSEA.

**Figure S1.** Matching H&E staining for focal sites of microglia reactivity. Representative images of H&E staining in 10% formalin-fixed, paraffin-embedded, 10  $\mu$ m sections at focal sites of reactivity in the thalamus, fornix, fimbria, internal capsule, and nucleus accumbens of female *Macaca fascicularis* following prolonged exposure to domoic acid (0.15 mg/kg/d) or vehicle (5% sucrose). Numbers correspond to Animal Numbers in Table S1. A15244 and A16106 were in the 0.15 mg/kg/d group, A15249, A16107, and A16106 were in the 0.075 mg/kg/d group, and A15428 was in the control group. Scale bar = 60  $\mu$ m.

**Additional File-** Excel Document
